# Supplementary material for: Venoms of Iranian Scorpions (Arachnida, Scorpiones) and Their Potential for Drug Discovery
Source: PubMed Central journal article supplement (PMC6680535; doi:10.3390/molecules24142670), 2019-07-23
Supplement: molecules-24-02670-s001.pdf [file molecules-24-02670-s001.pdf]

**Table S1.** List of Scorpion species of Iran. Asterisk indicates endemic species.

| Family                           | Genus                                                                                 | Species/Subspecies                                                                             |
|----------------------------------|---------------------------------------------------------------------------------------|------------------------------------------------------------------------------------------------|
| Family Buthidae C. L. Koch, 1837 | <i>Androctonus</i> Hemprich and Ehrenberg, 1828                                       | <i>Androctonus baluchicus</i> (Pocock, 1900)                                                   |
|                                  |                                                                                       | <i>Androctonus crassicauda</i> (Olivier, 1807)                                                 |
|                                  |                                                                                       | <i>Androctonus finitimus</i> (Pocock, 1897)                                                    |
|                                  |                                                                                       | <i>Androctonus robustus</i> Kovařík & Ahmed, 2013                                              |
|                                  | <i>Anomalobuthus</i> Kraepelin, 1900                                                  | * <i>Anomalobuthus talebii</i> Teruel, Kovařík, Navidpour and Fet, 2014                        |
|                                  | <i>Apistobuthus</i> Finnegan, 1932                                                    | * <i>Apistobuthus susanae</i> Lourenço, 1998                                                   |
|                                  | <i>Buthacus</i> Birula, 1908                                                          | <i>Buthacus macrocentrus</i> (Ehrenberg, 1828)                                                 |
|                                  | <i>Compsobuthus</i> Vachon, 1949                                                      | * <i>Compsobuthus garyi</i> Lourenço and Vachon, 2001                                          |
|                                  |                                                                                       | <i>Compsobuthus jakesi</i> Kovařík, 2003                                                       |
|                                  |                                                                                       | * <i>Compsobuthus kaftani</i> Kovařík, 2003                                                    |
|                                  |                                                                                       | <i>Compsobuthus matthiesseni</i> (Birula, 1905)                                                |
|                                  |                                                                                       | * <i>Compsobuthus persicus</i> Navidpour, Soleglad, Fet and Kovařík, 2008                      |
|                                  |                                                                                       | * <i>Compsobuthus petrioli</i> Vignoli, 2005                                                   |
|                                  |                                                                                       | * <i>Compsobuthus plutenkoi</i> Kovařík, 2003                                                  |
|                                  |                                                                                       | <i>Compsobuthus rugosulus</i> (Pocock, 1900)                                                   |
|                                  | <i>Hottentotta</i> Birula, 1908                                                       | <i>Hottentotta jayakari jayakari</i> (Pocock, 1895)                                            |
|                                  |                                                                                       | * <i>Hottentotta juliae</i> Kovařík, Yağmur and Fet, 2019                                      |
|                                  |                                                                                       | * <i>Hottentotta khoozestanus</i> Navidpour, Kovařík, Soleglad and Fet, 2008                   |
|                                  |                                                                                       | * <i>Hottentotta lorestanus</i> Navidpour, Nayebzadeh, Soleglad, Fet, Kovařík and Kayedi, 2010 |
|                                  |                                                                                       | * <i>Hottentotta navidpouri</i> Kovařík, Yağmur and Moradi, 2018                               |
|                                  |                                                                                       | <i>Hottentotta saulcyi</i> (Simon, 1880)                                                       |
|                                  |                                                                                       | * <i>Hottentotta schach</i> (Birula, 1905)                                                     |
|                                  |                                                                                       | * <i>Hottentotta sistanensis</i> Kovařík, Yağmur and Moradi, 2018                              |
|                                  |                                                                                       | * <i>Hottentotta zagrosensis</i> Kovařík, 1997                                                 |
|                                  | <i>Iranobuthus</i> Kovařík, 1997                                                      | * <i>Iranobuthus krali</i> Kovařík, 1997                                                       |
|                                  | <i>Kraepelinia</i> Vachon, 1974                                                       | <i>Kraepelinia palpator</i> (Birula, 1903)                                                     |
|                                  | <i>Liobuthus</i> Birula, 1898                                                         | <i>Liobuthus kessleri</i> Birula, 1898                                                         |
| <i>Mesobuthus</i> Vachon, 1950   | * <i>Mesobuthus agnetis</i> (Werner, 1936)                                            |                                                                                                |
|                                  | * <i>Mesobuthus brutus</i> Fet, Kovařík, Gantenbein, Kaiser, Stewart and Graham, 2018 |                                                                                                |
|                                  | <i>Mesobuthus caucasicus</i> (Nordmann, 1840)                                         |                                                                                                |
|                                  | <i>Mesobuthus eupeus afghanus</i> (Pocock, 1889)                                      |                                                                                                |
|                                  | <i>Mesobuthus eupeus eupeus</i> (C. L. Koch, 1839)                                    |                                                                                                |
|                                  | * <i>Mesobuthus eupeus iranus</i> (Birula, 1917)                                      |                                                                                                |

|  |                                             |                                                                                           |
|--|---------------------------------------------|-------------------------------------------------------------------------------------------|
|  |                                             | * <i>Mesobuthus eupeus mesopotamicus</i> (Penther, 1912)                                  |
|  |                                             | <i>Mesobuthus eupeus pachysoma</i> (Birula, 1900)                                         |
|  |                                             | <i>Mesobuthus eupeus persicus</i> (Pocock, 1899)                                          |
|  |                                             | <i>Mesobuthus eupeus philippovitschi</i> (Birula, 1905)                                   |
|  |                                             | <i>Mesobuthus eupeus thersites</i> (C. L. Koch, 1839)                                     |
|  |                                             | <i>Mesobuthus macmahoni</i> (Pocock, 1900)                                                |
|  |                                             | <i>Mesobuthus parthorum</i> (Pocock, 1889)                                                |
|  |                                             | <i>Mesobuthus phillipsi kirmanensis</i> (Birula, 1900)                                    |
|  |                                             | <i>Mesobuthus phillipsi phillipsi</i> (Pocock, 1889)                                      |
|  |                                             | * <i>Mesobuthus vesiculatus</i> (Pocock, 1899)                                            |
|  | Odontobuthus Vachon, 1950                   | <i>Odontobuthus bidentatus</i> Lourenço and Pézier, 2002                                  |
|  |                                             | * <i>Odontobuthus doriae</i> (Thorell, 1876)                                              |
|  |                                             | <i>Odontobuthus odonturus</i> (Pocock, 1897)                                              |
|  |                                             | * <i>Odontobuthus tavighiae</i> Navidpour, Soleglad, Fet and Kovařík, 2013                |
|  |                                             | * <i>Odontobuthus tirgari</i> Mirshamsi, Azghadi, Navidpour, Aliabadian and Kovarik, 2013 |
|  | Orthochirus Karsch, 1891                    | * <i>Orthochirus carinatus</i> Navidpour, Kovařík, Soleglad and Fet, 2019                 |
|  |                                             | * <i>Orthochirus farzanpayi</i> (Vachon and Farzanpay, 1987)                              |
|  |                                             | <i>Orthochirus fuscipes</i> (Pocock, 1900)                                                |
|  |                                             | * <i>Orthochirus gantenbeini</i> Kovařík, Yağmur, Fet and Hussen, 2019                    |
|  |                                             | <i>Orthochirus glabrifrons</i> (Kraepelin, 1903)                                          |
|  |                                             | * <i>Orthochirus gruberi</i> Kovařík and Fet, 2006                                        |
|  |                                             | * <i>Orthochirus iranus</i> Kovařík, 2004                                                 |
|  |                                             | <i>Orthochirus mesopotamicus</i> (Birula, 1918)                                           |
|  |                                             | * <i>Orthochirus navidpouri</i> Kovařík, Yağmur, Fet and Hussen, 2019                     |
|  |                                             | * <i>Orthochirus scrobiculosus dentatus</i> (Birula, 1900)                                |
|  |                                             | <i>Orthochirus scrobiculosus melanurus</i> Levy and Amitai, 1980                          |
|  |                                             | <i>Orthochirus scrobiculosus persa</i> (Birula, 1900)                                     |
|  |                                             | * <i>Orthochirus stockwelli</i> (Lourenço and Vachon, 1995)                               |
|  |                                             | * <i>Orthochirus varius</i> Kovařík, 2004                                                 |
|  |                                             | * <i>Orthochirus zagrosensis</i> Kovařík, 2004                                            |
|  | <i>Polisius</i> Fet, Capes and Sissom, 2001 | * <i>Polisius persicus</i> Fet, Capes and Sissom, 2001                                    |

|                                        |                                                  |                                                                                                                                                                                                                                                                                                                                                                                                                         |
|----------------------------------------|--------------------------------------------------|-------------------------------------------------------------------------------------------------------------------------------------------------------------------------------------------------------------------------------------------------------------------------------------------------------------------------------------------------------------------------------------------------------------------------|
|                                        | <i>Razianus</i> Farzanpay, 1987                  | * <i>Razianus zarudnyi</i> (Birula, 1903)                                                                                                                                                                                                                                                                                                                                                                               |
|                                        | <i>Sassanidotus</i> Farzanpay, 1987              | * <i>Sassanidotus gracilis</i> (Birula, 1900)<br>* <i>Sassanidotus zarudnyi</i> (Birula, 1903)                                                                                                                                                                                                                                                                                                                          |
|                                        | <i>Vachoniolus</i> Levy, Amitai and Shulov, 1973 | * <i>Vachoniolus iranus</i> Navidpour, Kovařík, Soleglad and Fet, 2008                                                                                                                                                                                                                                                                                                                                                  |
| Family Scorpionidae<br>Latreille, 1802 | <i>Scorpio</i> Linnaeus, 1758                    | <i>Scorpio maurus kruglovi</i> Birula, 1910<br><i>Scorpio maurus townsendi</i> (Pocock, 1900)                                                                                                                                                                                                                                                                                                                           |
| Family Hemiscorpiidae<br>Pocock, 1893  | <i>Hemiscorpius</i> Peters, 1861                 | * <i>Hemiscorpius acanthocercus</i> Monod and Lourenço, 2005<br>* <i>Hemiscorpius enischnochela</i> Monod and Lourenço, 2005<br>* <i>Hemiscorpius gaillardi</i> (Vachon, 1974)<br>* <i>Hemiscorpius kashkayi</i> Karatas and Mouradi-Gharkheloo, 2013<br><i>Hemiscorpius lepturus</i> Peters, 1861<br>* <i>Hemiscorpius persicus</i> Birula, 1903<br>* <i>Hemiscorpius shahii</i> Kovarik, Navidpour and Soleglad, 2017 |
| Family Diplocentridae<br>Karsch, 1880  | <i>Nebo</i> Simon, 1878                          | * <i>Nebo henjamicus</i> Francke, 1980                                                                                                                                                                                                                                                                                                                                                                                  |

**Table S2.** Number and percentage of scorpions in Iran.

| Family         | Number of genera | Percentage of genera | Number of species/subspecies | Percentage of species/subspecies |
|----------------|------------------|----------------------|------------------------------|----------------------------------|
| Buthidae       | 16               | 84.2                 | 68                           | 87.17                            |
| Hemiscorpiidae | 1                | 1.8                  | 7                            | 8.97                             |
| Scorpionidae   | 1                | 1.8                  | 2                            | 2.56                             |
| Diplocentridae | 1                | 1.8                  | 1                            | 1.28                             |
